# Supplementary material for: Dual Versus Single Oxygenated Hypothermic Machine Perfusion of Porcine Livers: Impact on Hepatobiliary and Endothelial Cell Injury
Source: PubMed Central journal article supplement — Transplant Direct. 2021 Aug 5;7(9):e741. doi: 10.1097/TXD.0000000000001184 (PMC8354629; doi:10.1097/txd.0000000000001184), 2021-08-05
Supplement: txd-7-e741-s001.pdf [file txd-7-e741-s001.pdf]

# Dual Versus Single Oxygenated Hypothermic Machine Perfusion of Porcine Donor Livers: Impact on Hepatobiliary and Endothelial Cell Injury

Yvonne de Vries<sup>1,2</sup>

Isabel M.A. Brüggewirth<sup>1,2</sup>

Shanice A. Karangwa<sup>1,2</sup>

Fien A. von Meijenfildt<sup>1,2</sup>

Otto B. van Leeuwen<sup>1,2</sup>

Laura C. Burlage<sup>1,2</sup>

Iris E.M. de Jong<sup>1,2</sup>

Annette S.H. Gouw<sup>3</sup>

Ton Lisman<sup>1,2</sup>

Robert J. Porte<sup>2</sup>

1) Surgical Research Laboratory, Department of Surgery

2) Section of Hepatobiliary Surgery and Liver Transplantation, Department of Surgery

3) Department of Pathology, University of Groningen, University Medical Center Groningen, Groningen, the Netherlands

**TABLE OF CONTENTS**

Table S1 ..... page 3

**Table S1.** Sequences of the used primers.

| Gene   | Code           |         | Primers                             |
|--------|----------------|---------|-------------------------------------|
| CD31   | NM_213907.1    | Forward | ACCCTGATTTAGTGGAAAACAGATATTCTA      |
|        |                | Reverse | CGTCTGCTCTGCGGTCCTA                 |
| eNOS   | NM_214295.1    | Forward | GTGGAGTTAGGTGAATTTTAGATTCCC         |
|        |                | Reverse | ATTTACAGATCAGGTTTTAAGATGAGATGA<br>G |
| ET-1   | NM_213882.1    | Forward | GGGACGGCCATATTGGTCTAT               |
|        |                | Reverse | CAAAACGAAGCATTTTCTCAATTC            |
| KLF-2  | NM_001134351.2 | Forward | AGCCTTAATTTGTA CTGTGCAACATT         |
|        |                | Reverse | CCTGCCTTCCTATTTACAGTAAATACAAT       |
| VEGF-A | NM_214084      | Forward | GGAGCGGAGAAAGCATTGTT                |
|        |                | Reverse | GCGAGTCTGTGTTTTTGCAGG               |
| VWF    | AF_052036      | Forward | ATGACACTGAAGCGCGATGAG               |
|        |                | Reverse | CGTGATCCTCTTCTCCCAGATG              |
| GAPDH  | AF017079.1     | Forward | CCTGCCGTCTGGAGAAACC                 |
|        |                | Reverse | CTCGGACGCCTGCTTCA                   |

Abbreviations: eNOS, endothelial nitric oxide synthase; ET-1, endothelin-1; KLF-2, kruppel-like-factor-2; VEGF-A, vascular endothelial growth factor A; VWF, von Willebrand factor.
